# Supplementary material
Source: PubMed Central journal article supplement (PMC6374221)

**Ambio**

Electronic Supplementary Material

*This supplementary material has not been peer reviewed*

Title:

Effects of bird community dynamics on the seasonal distribution of cultural ecosystem services

Authors:

Rose A. Graves, Scott M. Pearson, Monica G. Turner

## **Appendix S1: Supplemental Methods**

### **Predictor variable: data collection and preliminary analysis**

Environmental variables included local and landscape building density, land cover diversity, tree cover, vegetation structural diversity, estimated annual productivity, and elevation. Annual productivity and elevation were extracted at the center point of each study site. The remaining variables were extracted at various buffer sizes (100 m, 200 m, 300 m, 400 m, 500 m, 750 m, 1000 m) around the center of each study site to test for differences in the effect of landscape extent on bird communities. We used univariate regression and Akaike's Information Criterion (AICc; Burnham and Anderson 2002) to determine at which scale each environmental variable had the strongest relationship with bird CES indicator variables.

Digitized building footprints from county governments were used to locate each building (Graves et al. 2017a). Building density at local scales (100 – 200 m) has a significant effect on breeding bird occupancy within the study area (Lumpkin and Pearson 2013). We use 100-m radii in this study because preliminary data analyses revealed stronger univariate relationships between bird species richness and building density at 100 m than 200 m. We also tested for effects of building density within 1000 m of the study site center, since birds may be responding to broader scale habitat variables.

Discrete-return LIDAR data were collected in winter 2005 (NCDEM 2006) for the entirety of the study area. Vegetation height was measured from LIDAR first returns by subtracting the elevation of a bare-earth digital terrain model, derived from the same LIDAR data set, from the elevation of each return (Graves et al. 2017a). We excluded returns within digitized building footprints. Vegetation height was used to calculate vegetation structural diversity and tree cover as described in the Main Text.

## Maps of predictor variables

Input layers were created for each predictor variable in order to project landscape CES supply using the *predict* function in the *raster* package for R. All input layers were standardized to z-scores based on the mean and variance of the training dataset (n=56) and referenced to the same projection (Albers Equal Area) and 100-m grid cell. The 100-m grid cell was chosen to correspond with the 100-m National Elevation Dataset digital elevation model (available from the U.S. Geological Survey: <https://catalog.data.gov/dataset/100-meter-resolution-elevation-of-the-conterminous-united-states-direct-download>). The NED DEM layer was also used to extract the elevation predictor layer.

We created maps of tree cover and vegetation diversity within each 100-m pixel and used a moving window analysis to calculate the landcover diversity (SIDI) within 200 m and local and neighborhood building density for each 100-m pixel. Building footprints were obtained from county government GIS offices and converted to point locations. Local building density (building units per hectare) was quantified using the point-density tool with a 100-m circular moving window in ArcMap 10.4, with the output raster specified as a 100-m grid matching the NED DEM, and points/ha as the output value. Similarly, neighborhood building density was quantified using the point-density tool with a 1-km circular moving window, with the output raster specified as a 100-m grid matching the NED DEM, and points/ha as the output value.

We used 30-m raster data from the 2014 National Crop Data Layer (CDL; USDA NASS 2014) to create maps of landcover diversity within 200 m of each 100-m grid cell using a moving window analysis in GIS. We first reclassified the CDL to six land-cover categories (grassland/herb, shrubland, cropland, forest, developed and other/water). Land-cover diversity was calculated as the Simpson's diversity index ( $SIDI = 1 - \sum_{i=1}^m P_i^2$ ) using six land-cover

categories (grassland/herb, shrubland, cropland, forest, developed and other/water) within 200 m of each cell center.

Forest canopy cover maps were created using the proportion of LIDAR returns within each 100-m grid cell within the subcanopy or canopy layers (i.e., >2.0 m above ground). Discrete-return LIDAR data were collected in winter 2005 (NCDEM 2006) for the entirety of the study area during winter. Vegetation height was measured from LIDAR first returns by subtracting the elevation of a bare-earth digital terrain model, derived from the same LIDAR data set, from the elevation of each return. Only first returns were used, and we excluded returns within digitized building footprints. Vegetation structural diversity was calculated using the Shannon Evenness index ( $E_H = \frac{-\sum_{i=1}^S p_i \ln p_i}{\ln S}$ ) using the proportion ( $p_i$ ) of LIDAR returns in each of four vegetation strata (i.e., herb, shrub, subcanopy, and canopy layers) for each 100-m grid cell.

Annual vegetation productivity was extracted from a smoothed and gap-filled MODIS Normalized Difference Vegetation Index (NDVI) dataset (Spruce et al. 2016). We calculated the 10-year (2004 – 2014) median of annual vegetation productivity for each study site and subsampled to a 100-m resolution.

## REFERENCES

Johnston, R. F. 2001. Synanthropic birds of north America. Pages 49–67 *Avian ecology and conservation in an urbanizing world*. Springer.

NCDEM (North Carolina Division of Emergency Management). 2006. NC Flood Mapping: LIDAR Phase 3 all-returns data, French Broad River basin. Floodplain Mapping Program, NCDEM, Raleigh, North Carolina. Available online at <http://fris.nc.gov/fris/Download.aspx?ST=NC>

Rodewald, P. (Editor). 2015. *The Birds of North America*: <https://birdsna.org>. Cornell Laboratory of Ornithology, Ithaca, NY

Spruce, J. P., G. E. Gasser, and W. W. Hargrove. 2016. MODIS NDVI Data, Smoothed and Gap-filled, for the Conterminous US: 2000-2015. ORNL DAAC, Oak Ridge, TN, USA.

Sullivan, B. L., C. L. Wood, M. J. Iliff, R. E. Bonney, D. Fink, and S. Kelling. 2009. eBird: A citizen-based bird observation network in the biological sciences. *Biological Conservation* 142:2282–2292.

USDA National Agricultural Statistics Service (NASS). 2014. Cropland Data Layer, published crop-specific data layer [Online]. Available at <https://nassgeodata.gmu.edu/CropScape/> . USDA-NASS, Washington, DC.

Table S1. List of species observed and their classification at 56 sites during April – August 2014 in the French Broad River Basin, NC. The most commonly occurring species (observed at 90% or more of the study sites) were Tufted Titmouse (100% of sites), Carolina Chickadee (98%), Northern Cardinal (96%), American Robin (93%), Blue Jay (93%), Eastern Towhee (93%), and Carolina Wren (91%). Migratory status was determined using Rodewald 2015; synanthrope status follows Johnston 2001; and infrequent species were classified as the least frequently recorded species for the French Broad River Basin in the eBird dataset (Sullivan et al. 2009).

| Common Name             | Code | Species name          | Migratory status | Synanthrope status | Listed in NC Wildlife Action Plan | Infrequent species |
|-------------------------|------|-----------------------|------------------|--------------------|-----------------------------------|--------------------|
| Acadian flycatcher      | ACFL | Empidonax virescens   | neotropical      | NA                 | 0                                 | 1                  |
| American crow           | AMCR | Corvus brachyrhynchos | resident         | Tangential         | 0                                 | 0                  |
| American goldfinch      | AMGO | Spinus tristis        | resident         | NA                 | 0                                 | 0                  |
| American kestrel        | AMKE | Falco sparverius      | short-distance   | Tangential         | 1                                 | 1                  |
| American redstart       | AMRE | Setophaga ruticilla   | neotropical      | Tangential         | 0                                 | 0                  |
| American robin          | AMRO | Turdus migratorius    | resident         | Casual             | 0                                 | 0                  |
| Baltimore oriole        | BAOR | Icterus galbula       | neotropical      | NA                 | 0                                 | 1                  |
| Barn swallow            | BARS | Hirundo rustica       | neotropical      | Tangential         | 0                                 | 0                  |
| Black-and-white warbler | BAWW | Mniotilta varia       | neotropical      | NA                 | 0                                 | 0                  |
| Bay-breasted warbler    | BBWA | Setophaga castanea    | neotropical      | NA                 | 0                                 | 1                  |
| Blue-gray gnatcatcher   | BGGN | Polioptila caerulea   | neotropical      | NA                 | 0                                 | 0                  |
| Brown-headed cowbird    | BHCO | Molothrus ater        | short-distance   | Tangential         | 0                                 | 0                  |
| Blue-headed vireo       | BHVI | Vireo solitarius      | short-distance   | NA                 | 0                                 | 0                  |
| Blackburnian warbler    | BLBW | Setophaga fusca       | neotropical      | NA                 | 0                                 | 1                  |
| Blue grosbeak           | BLGR | Passerina caerulea    | neotropical      | NA                 | 0                                 | 1                  |
| Blue jay                | BLJA | Cyanocitta cristata   | resident         | Tangential         | 0                                 | 0                  |

|                              |      |                          |                |            |   |   |
|------------------------------|------|--------------------------|----------------|------------|---|---|
| Blackpoll warbler            | BLPW | Setophaga striata        | neotropical    | NA         | 0 | 1 |
| Brown thrasher               | BRTH | Toxostoma rufum          | short-distance | NA         | 0 | 0 |
| Black-throated blue warbler  | BTBW | Setophaga caerulescens   | neotropical    | NA         | 0 | 0 |
| Black-throated green warbler | BTNW | Setophaga virens         | neotropical    | NA         | 1 | 1 |
| Broad-winged hawk            | BWHA | Buteo platypterus        | neotropical    | NA         | 0 | 1 |
| Carolina chickadee           | CACH | Poecile carolinensis     | resident       | Tangential | 0 | 0 |
| Carolina wren                | CARW | Thryothorus ludovicianus | resident       | NA         | 0 | 0 |
| Canada warbler               | CAWA | Cardellina canadensis    | neotropical    | NA         | 1 | 1 |
| Cedar waxwing                | CEDW | Bombycilla cedrorum      | resident       | NA         | 0 | 0 |
| Cerulean warbler             | CERW | Setophaga cerulea        | neotropical    | NA         | 1 | 1 |
| Chipping sparrow             | CHSP | Spizella passerina       | neotropical    | Tangential | 0 | 0 |
| Chimney swift                | CHSW | Chaetura pelagica        | neotropical    | Full       | 1 | 1 |
| Cape May warbler             | CMWA | Setophaga tigrina        | neotropical    | NA         | 0 | 1 |
| Common grackle               | COGR | Quiscalus quiscula       | short distance | Tangential | 0 | 0 |
| Cooper's hawk                | COHA | Accipiter cooperii       | resident       | NA         | 1 | 1 |
| Common raven                 | CORA | Corvus corax             | resident       | Tangential | 0 | 1 |
| Common yellowthroat          | COYE | Geothlypis trichas       | short-distance | Tangential | 0 | 1 |
| Chestnut-sided warbler       | CSWA | Setophaga pensylvanica   | neotropical    | NA         | 0 | 0 |
| Dark-eyed junco              | DEJU | Junco hyemalis           | resident       | Tangential | 0 | 0 |
| Downy woodpecker             | DOWO | Picoides pubescens       | resident       | Tangential | 0 | 0 |
| Eastern bluebird             | EABL | Sialia sialis            | short-distance | Tangential | 0 | 0 |
| Eastern kingbird             | EAKI | Tyrannus tyrannus        | neotropical    | NA         | 1 | 1 |
| Eastern meadowlark           | EAME | Sturnella magna          | resident       | Tangential | 1 | 1 |
| Eastern phoebe               | EAPH | Sayornis phoebe          | resident       | NA         | 0 | 0 |
| Eastern screech-owl          | EASO | Megascops asio           | resident       | NA         | 0 | 1 |
| Eastern towhee               | EATO | Pipilo maculatus/erythr  | short-distance | Tangential | 0 | 0 |
| Eastern wood-                | EAWP | Contopus virens          | neotropical    | NA         | 0 | 0 |

|                               |      |                                   |                |            |   |   |  |
|-------------------------------|------|-----------------------------------|----------------|------------|---|---|--|
| pewee                         |      |                                   |                |            |   |   |  |
| European starling             | EUST | <i>Sturnus vulgaris</i>           | resident       | Full       | 0 | 0 |  |
| Field sparrow                 | FISP | <i>Spizella pusilla</i>           | short-distance | NA         | 1 | 1 |  |
| Great crested flycatcher      | GCFL | <i>Myiarchus crinitus</i>         | neotropical    | NA         | 0 | 1 |  |
| Golden-crowned kinglet        | GCKI | <i>Regulus satrapa</i>            | short-distance | NA         | 0 | 0 |  |
| Gray catbird                  | GRCA | <i>Dumetella carolinensis</i>     | neotropical    | Tangential | 0 | 0 |  |
| Hairy woodpecker              | HAWO | <i>Picoides villosus</i>          | resident       | Tangential | 1 | 1 |  |
| Hermit thrush                 | HETH | <i>Catharus guttatus</i>          | short-distance | NA         | 0 | 1 |  |
| House finch                   | HOFI | <i>Haemorhous mexicanus</i>       | resident       | NA         | 0 | 0 |  |
| Hooded warbler                | HOWA | <i>Setophaga citrina</i>          | neotropical    | NA         | 1 | 1 |  |
| House wren                    | HOWR | <i>Troglodytes aedon</i>          | neotropical    | Tangential | 0 | 1 |  |
| Indigo bunting                | INBU | <i>Passerina cyanea</i>           | neotropical    | NA         | 0 | 0 |  |
| Kentucky warbler              | KEWA | <i>Geothlypis formosa</i>         | neotropical    | NA         | 1 | 1 |  |
| Louisiana waterthrush         | LOWA | <i>Parkesia motacilla</i>         | neotropical    | NA         | 0 | 1 |  |
| Mourning dove                 | MODO | <i>Zenaida macroura</i>           | resident       | Tangential | 0 | 0 |  |
| Northern bobwhite             | NOBO | <i>Colinus virginianus</i>        | resident       | Casual     | 0 | 1 |  |
| Northern cardinal             | NOCA | <i>Cardinalis cardinalis</i>      | resident       | Tangential | 0 | 0 |  |
| Northern flicker              | NOFL | <i>Colaptes auratus</i>           | short-distance | Tangential | 0 | 0 |  |
| Northern mockingbird          | NOMO | <i>Mimus polyglottos</i>          | resident       | Tangential | 0 | 0 |  |
| Northern parula               | NOPA | <i>Setophaga americana</i>        | neotropical    | NA         | 0 | 0 |  |
| Northern pintail              | NOPI | <i>Anas acuta</i>                 | short-distance | NA         | 0 | 1 |  |
| Northern rough-winged swallow | NRWS | <i>Stelgidopteryx serripennis</i> | neotropical    | Tangential | 0 | 1 |  |
| Ovenbird                      | OVEN | <i>Seiurus aurocapilla</i>        | neotropical    | NA         | 0 | 1 |  |
| Palm warbler                  | PAWA | <i>Setophaga palmarum</i>         | short-distance | NA         | 0 | 1 |  |
| Pine warbler                  | PIWA | <i>Setophaga pinus</i>            | short-distance | NA         | 0 | 1 |  |
| Pileated woodpecker           | PIWO | <i>Dryocopus pileatus</i>         | resident       | NA         | 0 | 0 |  |



|                           |      |                                |                |            |   |   |
|---------------------------|------|--------------------------------|----------------|------------|---|---|
| Rose-breasted grosbeak    | RBGR | <i>Pheucticus ludovicianus</i> | neotropical    | NA         | 1 | 1 |
| Red-breasted nuthatch     | RBNU | <i>Sitta canadensis</i>        | resident       | Tangential | 0 | 1 |
| Red-bellied woodpecker    | RBWO | <i>Melanerpes carolinus</i>    | resident       | Tangential | 0 | 0 |
| Ruby-crowned kinglet      | RCKI | <i>Regulus calendula</i>       | short-distance | Tangential | 0 | 1 |
| Red-eyed vireo            | REVI | <i>Vireo olivaceus</i>         | neotropical    | Tangential | 0 | 0 |
| Red-shouldered hawk       | RSHA | <i>Buteo lineatus</i>          | short-distance | NA         | 0 | 0 |
| Red-tailed hawk           | RTHA | <i>Buteo jamaicensis</i>       | resident       | Tangential | 0 | 0 |
| Ruby-throated hummingbird | RTHU | <i>Archilochus colubris</i>    | neotropical    | Tangential | 0 | 0 |
| Ruffed grouse             | RUGR | <i>Bonasa umbellus</i>         | resident       | Casual     | 0 | 1 |
| Red-winged blackbird      | RWBL | <i>Agelaius phoeniceus</i>     | short-distance | Tangential | 0 | 0 |
| Scarlet tanager           | SCTA | <i>Piranga olivacea</i>        | neotropical    | NA         | 0 | 0 |
| Song sparrow              | SOSP | <i>Melospiza melodia</i>       | resident       | Tangential | 0 | 0 |
| Swainson's warbler        | SWWA | <i>Limnothlypis swainsonii</i> | short-distance | NA         | 1 | 1 |
| Tree swallow              | TRES | <i>Tachycineta bicolor</i>     | resident       | Tangential | 0 | 0 |
| Tufted titmouse           | TUTI | <i>Baeolophus bicolor</i>      | resident       | Tangential | 0 | 0 |
| Veery                     | VEER | <i>Catharus fuscescens</i>     | neotropical    | NA         | 0 | 1 |
| White-breasted nuthatch   | WBNU | <i>Sitta carolinensis</i>      | resident       | Tangential | 0 | 0 |
| White-eyed vireo          | WEVI | <i>Vireo griseus</i>           | short-distance | NA         | 0 | 1 |
| Worm-eating warbler       | WEWA | <i>Helmitheros vermivorum</i>  | neotropical    | NA         | 1 | 1 |
| Wild turkey               | WITU | <i>Meleagris gallopavo</i>     | resident       | Casual     | 0 | 0 |
| Winter wren               | WIWR | <i>Aix sponsa</i>              | short-distance | Casual     | 0 | 0 |
| Wood thrush               | WOTH | <i>Hylocichla mustelina</i>    | neotropical    | NA         | 1 | 1 |
| White-throated sparrow    | WTSP | <i>Zonotrichia albicollis</i>  | short-distance | Tangential | 0 | 0 |
| Yellow-billed cuckoo      | YBCU | <i>Coccyzus americanus</i>     | neotropical    | Tangential | 0 | 1 |
| Yellow-bellied sapsucker  | YBSA | <i>Sphyrapicus varius</i>      | short-distance | NA         | 1 | 1 |
| Yellow-rumped warbler     | YRWA | <i>Setophaga coronata</i>      | neotropical    | NA         | 0 | 0 |

|                         |      |                    |             |    |   |   |
|-------------------------|------|--------------------|-------------|----|---|---|
| Yellow-throated vireo   | YTVI | Vireo flavifrons   | neotropical | NA | 0 | 1 |
| Yellow-throated warbler | YTWA | Setophaga dominica | neotropical | NA | 0 | 1 |

---

Table S2. Temporal consistency of bird CES hotspots.

| Temporal consistency category   | Percent of landscape in each category |                            |                           |                               |                         |
|---------------------------------|---------------------------------------|----------------------------|---------------------------|-------------------------------|-------------------------|
|                                 | All bird species richness             | Migratory species richness | Resident species richness | Synanthropic species richness | 'Rare' species richness |
| Never classified as hotspot     | 66%                                   | 21%                        | 63%                       | 67%                           | 23%                     |
| Hotspot during one time period  | <1%                                   | 12%                        | 8%                        | 8%                            | 12%                     |
| Hotspot during two time periods | 2%                                    | 3%                         | 3%                        | 3%                            | 20%                     |
| Always classified as hotspot    | 32%                                   | 63%                        | 25%                       | 23%                           | 45%                     |

Table S3. Overlap of projected hotspots of bird CES supply and public accessibility, measured as the percent of the bird CES hotspot contained within public accessibility categories, during three time periods from April to August.

| Bird CES indicator           | Time period  | Percent of hotspot area |                       |                           |
|------------------------------|--------------|-------------------------|-----------------------|---------------------------|
|                              |              | Highly accessible       | Moderately accessible | Private or limited access |
| All species richness         | Early spring | 4%                      | 5%                    | 91%                       |
|                              | Late spring  | 4%                      | 5%                    | 91%                       |
|                              | Summer       | 4%                      | 5%                    | 91%                       |
| Migratory species richness   | Early spring | 6%                      | 29%                   | 65%                       |
|                              | Late spring  | 5%                      | 26%                   | 69%                       |
|                              | Summer       | 5%                      | 31%                   | 64%                       |
| Resident species richness    | Early spring | 4%                      | 5%                    | 91%                       |
|                              | Late spring  | 3%                      | 3%                    | 94%                       |
|                              | Summer       | 4%                      | 4%                    | 92%                       |
| Synanthrope species richness | Early spring | 4%                      | 4%                    | 91%                       |
|                              | Late spring  | 4%                      | 4%                    | 92%                       |
|                              | Summer       | 4%                      | 5%                    | 91%                       |
| Rare species richness        | Early spring | 5%                      | 28%                   | 67%                       |
|                              | Late spring  | 5%                      | 29%                   | 66%                       |
|                              | Summer       | 5%                      | 36%                   | 59%                       |

Figure S1. Maps of standard error of projected bird CES for total, migratory, resident, synanthrope, and infrequent species richness (left to right in each row). Standard error did not change across time periods.

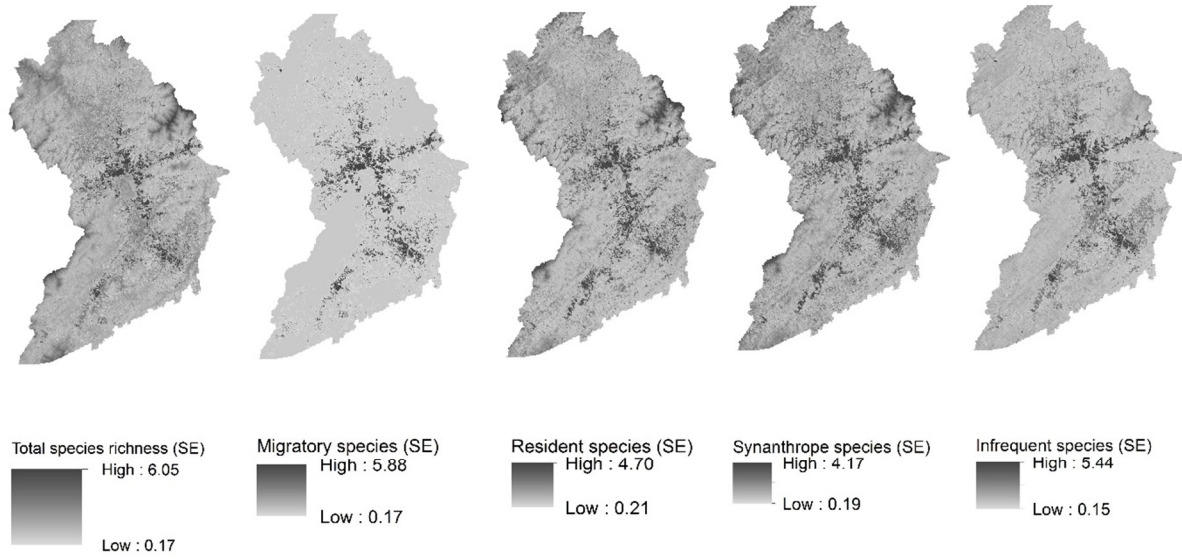

Figure S2. Distribution of publicly accessible areas classified by three levels of access (high, moderate, and limited) within the study area.

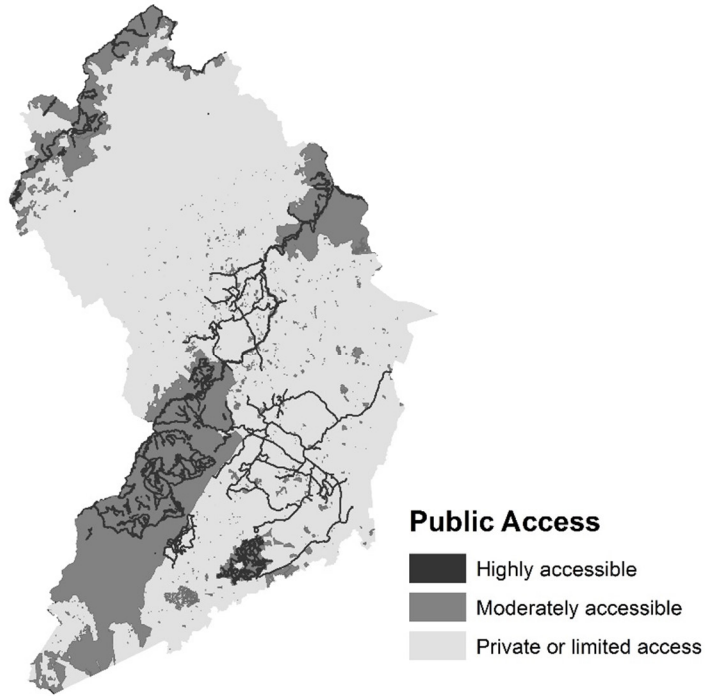

Figure S3. Locations of eBird observations during early spring, late spring, and summer from the years 2009 – 2014.

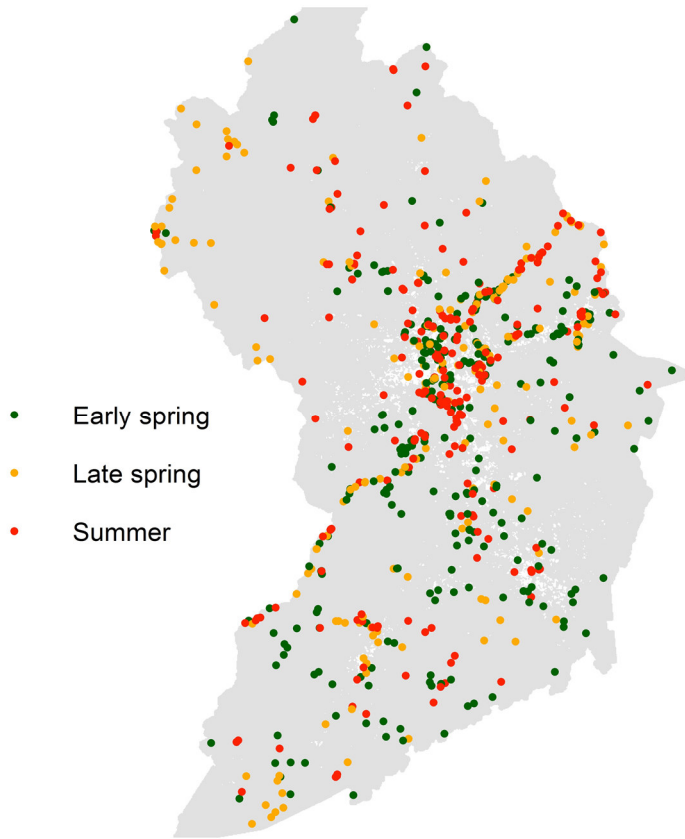

Supplement: 13280_2018_1068_MOESM1_ESM.pdf [file 13280_2018_1068_MOESM1_ESM.pdf]
